# Supplementary material
Source: Springer Nature journal article supplement (https://www.springermedizin.de/resource/supplementary/12943_2012_1114_MOESM3_ESM.pdf/9552476)

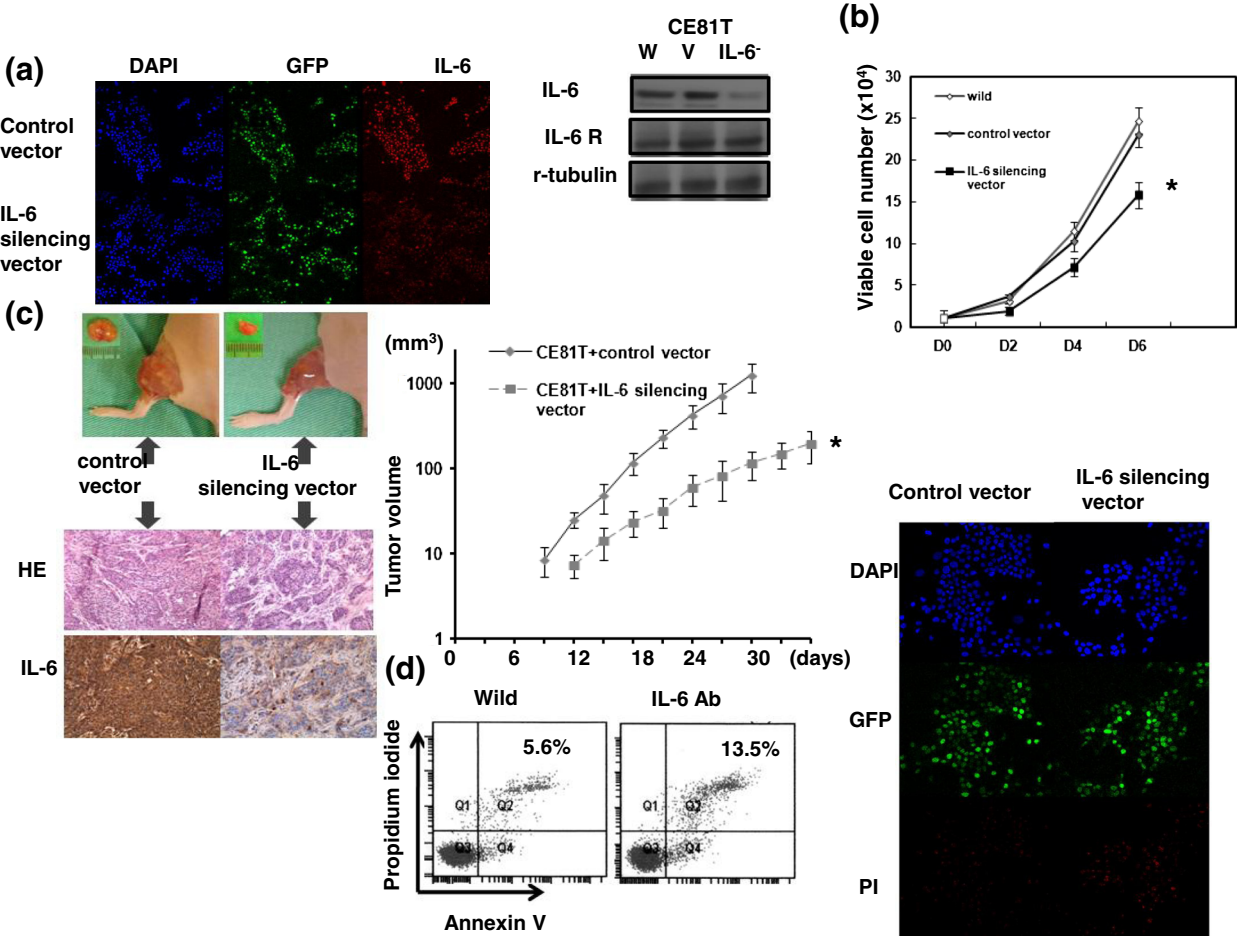

Supplement: MOESM3 [file 9552476]
